# Supplementary material for: The functional role of inherited CDKN2A variants in childhood acute lymphoblastic leukemia
Source: PubMed Central journal article supplement — Pharmacogenet Genomics. 2021 Aug 6;32(2):43–50. doi: 10.1097/FPC.0000000000000451 (PMC8694244; doi:10.1097/fpc.0000000000000451), 2021-08-06
Supplement: pgen-32-43-s001.pdf [file pgen-32-43-s001.pdf]

**Supplementary Table 1. Diseases/traits associated *CDKN2A/2B* SNPs**

| <b>SNP ID</b> | <b>P.value</b> | <b>Disease/trait</b>         |
|---------------|----------------|------------------------------|
| rs662463      | 1.54E-04       | Acute lymphoblastic leukemia |
| rs17694572    | 2.18E-04       | Acute lymphoblastic leukemia |
| rs17694493    | 3.46E-04       | Acute lymphoblastic leukemia |
| rs2811720     | 6.80E-03       | Acute lymphoblastic leukemia |
| rs7044859     | 7.60E-03       | Acute lymphoblastic leukemia |
| rs575427      | 9.02E-03       | Acute lymphoblastic leukemia |
| rs10965215    | 9.28E-03       | Acute lymphoblastic leukemia |
| rs10965212    | 1.87E-02       | Acute lymphoblastic leukemia |
| rs10120688    | 2.23E-02       | Acute lymphoblastic leukemia |
| rs9657608     | 2.44E-02       | Acute lymphoblastic leukemia |
| rs10965219    | 3.43E-02       | Acute lymphoblastic leukemia |
| rs717326      | 4.79E-02       | Acute lymphoblastic leukemia |
| rs1360137     | 7.81E-02       | Acute lymphoblastic leukemia |
| rs10757270    | 9.08E-02       | Acute lymphoblastic leukemia |
| rs1590626     | 0.107733139    | Acute lymphoblastic leukemia |
| rs1329404     | 0.117974006    | Acute lymphoblastic leukemia |
| rs12352425    | 0.118752025    | Acute lymphoblastic leukemia |
| rs7868374     | 0.120045804    | Acute lymphoblastic leukemia |
| rs10738625    | 0.126334518    | Acute lymphoblastic leukemia |
| rs6475606     | 0.129891983    | Acute lymphoblastic leukemia |
| rs1333048     | 0.137058496    | Acute lymphoblastic leukemia |
| rs10757272    | 0.13793194     | Acute lymphoblastic leukemia |
| rs4977574     | 0.142278371    | Acute lymphoblastic leukemia |
| rs7853527     | 0.148797059    | Acute lymphoblastic leukemia |
| rs1333053     | 0.153790715    | Acute lymphoblastic leukemia |
| rs2383213     | 0.157418922    | Acute lymphoblastic leukemia |
| rs1333049     | 0.161026334    | Acute lymphoblastic leukemia |
| rs17761446    | 0.165805171    | Acute lymphoblastic leukemia |
| rs7856683     | 0.166994512    | Acute lymphoblastic leukemia |

|            |             |                              |
|------------|-------------|------------------------------|
| rs10113901 | 0.168181756 | Acute lymphoblastic leukemia |
| rs2891168  | 0.177607028 | Acute lymphoblastic leukemia |
| rs12555547 | 0.188065835 | Acute lymphoblastic leukemia |
| rs7864029  | 0.192668557 | Acute lymphoblastic leukemia |
| rs16923583 | 0.192668557 | Acute lymphoblastic leukemia |
| rs7851706  | 0.197244762 | Acute lymphoblastic leukemia |
| rs7872794  | 0.197244762 | Acute lymphoblastic leukemia |
| rs7039105  | 0.199523239 | Acute lymphoblastic leukemia |
| rs4977749  | 0.208575734 | Acute lymphoblastic leukemia |
| rs1333042  | 0.209700617 | Acute lymphoblastic leukemia |
| rs10965279 | 0.215303684 | Acute lymphoblastic leukemia |
| rs1329394  | 0.217535178 | Acute lymphoblastic leukemia |
| rs10965224 | 0.230813453 | Acute lymphoblastic leukemia |
| rs2518713  | 0.240655159 | Acute lymphoblastic leukemia |
| rs7024096  | 0.240655159 | Acute lymphoblastic leukemia |
| rs828580   | 0.250404141 | Acute lymphoblastic leukemia |
| rs10757321 | 0.266462416 | Acute lymphoblastic leukemia |
| rs10965256 | 0.270707072 | Acute lymphoblastic leukemia |
| rs10811668 | 0.292754185 | Acute lymphoblastic leukemia |
| rs8181047  | 0.296911134 | Acute lymphoblastic leukemia |
| rs10757283 | 0.304155164 | Acute lymphoblastic leukemia |
| rs1409776  | 0.30930635  | Acute lymphoblastic leukemia |
| rs1327045  | 0.315463211 | Acute lymphoblastic leukemia |
| rs10757308 | 0.336813465 | Acute lymphoblastic leukemia |
| rs7850937  | 0.337822818 | Acute lymphoblastic leukemia |
| rs7864275  | 0.33983961  | Acute lymphoblastic leukemia |
| rs1679014  | 0.377706214 | Acute lymphoblastic leukemia |
| rs2383216  | 0.386558473 | Acute lymphoblastic leukemia |
| rs12003027 | 0.393415377 | Acute lymphoblastic leukemia |
| rs7851133  | 0.396346718 | Acute lymphoblastic leukemia |
| rs3731194  | 0.396346718 | Acute lymphoblastic leukemia |
| rs2383209  | 0.405115096 | Acute lymphoblastic leukemia |

|            |             |                              |
|------------|-------------|------------------------------|
| rs1410979  | 0.418681225 | Acute lymphoblastic leukemia |
| rs2891170  | 0.421577038 | Acute lymphoblastic leukemia |
| rs6475641  | 0.434081753 | Acute lymphoblastic leukemia |
| rs7045889  | 0.443654071 | Acute lymphoblastic leukemia |
| rs505447   | 0.456040347 | Acute lymphoblastic leukemia |
| rs4478654  | 0.456990522 | Acute lymphoblastic leukemia |
| rs7863846  | 0.465525795 | Acute lymphoblastic leukemia |
| rs4977761  | 0.470255188 | Acute lymphoblastic leukemia |
| rs3903983  | 0.481570747 | Acute lymphoblastic leukemia |
| rs10811688 | 0.482511533 | Acute lymphoblastic leukemia |
| rs4977772  | 0.486271402 | Acute lymphoblastic leukemia |
| rs1575964  | 0.495648583 | Acute lymphoblastic leukemia |
| rs10811685 | 0.499390666 | Acute lymphoblastic leukemia |
| rs1410976  | 0.503127841 | Acute lymphoblastic leukemia |
| rs1333051  | 0.511518923 | Acute lymphoblastic leukemia |
| rs10121530 | 0.513380368 | Acute lymphoblastic leukemia |
| rs10811687 | 0.520814645 | Acute lymphoblastic leukemia |
| rs1327046  | 0.521742653 | Acute lymphoblastic leukemia |
| rs510901   | 0.526378514 | Acute lymphoblastic leukemia |
| rs7871143  | 0.529156724 | Acute lymphoblastic leukemia |
| rs1359740  | 0.539322765 | Acute lymphoblastic leukemia |
| rs16906084 | 0.551296558 | Acute lymphoblastic leukemia |
| rs3218022  | 0.584241245 | Acute lymphoblastic leukemia |
| rs2811710  | 0.594249505 | Acute lymphoblastic leukemia |
| rs7869004  | 0.603325881 | Acute lymphoblastic leukemia |
| rs10811659 | 0.605138707 | Acute lymphoblastic leukemia |
| rs12341394 | 0.620515886 | Acute lymphoblastic leukemia |
| rs10965290 | 0.621418694 | Acute lymphoblastic leukemia |
| rs564398   | 0.623223747 | Acute lymphoblastic leukemia |
| rs6475620  | 0.625028053 | Acute lymphoblastic leukemia |
| rs2188126  | 0.633138335 | Acute lymphoblastic leukemia |
| rs2891169  | 0.641234091 | Acute lymphoblastic leukemia |

|            |             |                              |
|------------|-------------|------------------------------|
| rs3935920  | 0.64392953  | Acute lymphoblastic leukemia |
| rs10733377 | 0.661860456 | Acute lymphoblastic leukemia |
| rs7042832  | 0.674373874 | Acute lymphoblastic leukemia |
| rs10965267 | 0.679727598 | Acute lymphoblastic leukemia |
| rs7047631  | 0.693978493 | Acute lymphoblastic leukemia |
| rs9406787  | 0.699313276 | Acute lymphoblastic leukemia |
| rs693370   | 0.709081082 | Acute lymphoblastic leukemia |
| rs1547704  | 0.718833129 | Acute lymphoblastic leukemia |
| rs1537377  | 0.74358996  | Acute lymphoblastic leukemia |
| rs10757292 | 0.744472459 | Acute lymphoblastic leukemia |
| rs6475619  | 0.747119293 | Acute lymphoblastic leukemia |
| rs3218003  | 0.796359402 | Acute lymphoblastic leukemia |
| rs10965266 | 0.805122136 | Acute lymphoblastic leukemia |
| rs1359739  | 0.805122136 | Acute lymphoblastic leukemia |
| rs4977736  | 0.806873702 | Acute lymphoblastic leukemia |
| rs7018475  | 0.832237114 | Acute lymphoblastic leukemia |
| rs16905988 | 0.852311551 | Acute lymphoblastic leukemia |
| rs3802394  | 0.853183604 | Acute lymphoblastic leukemia |
| rs518394   | 0.85579941  | Acute lymphoblastic leukemia |
| rs1679023  | 0.856671229 | Acute lymphoblastic leukemia |
| rs523096   | 0.85928634  | Acute lymphoblastic leukemia |
| rs11791416 | 0.864515045 | Acute lymphoblastic leukemia |
| rs10965245 | 0.869741793 | Acute lymphoblastic leukemia |
| rs10811661 | 0.870612733 | Acute lymphoblastic leukemia |
| rs7022662  | 0.872354458 | Acute lymphoblastic leukemia |
| rs7865618  | 0.873225243 | Acute lymphoblastic leukemia |
| rs4545183  | 0.881060078 | Acute lymphoblastic leukemia |
| rs10120722 | 0.894109733 | Acute lymphoblastic leukemia |
| rs4977569  | 0.921918917 | Acute lymphoblastic leukemia |
| rs10757282 | 0.932338632 | Acute lymphoblastic leukemia |
| rs10965278 | 0.979188582 | Acute lymphoblastic leukemia |
| rs944031   | 0.983524524 | Acute lymphoblastic leukemia |

|             |            |                                                                          |
|-------------|------------|--------------------------------------------------------------------------|
| rs7024703   | 0.99826578 | Acute lymphoblastic leukemia                                             |
| rs116150891 | NA         | Acute lymphoblastic leukemia                                             |
| rs146179135 | 0.653      | Acute lymphoblastic leukemia                                             |
| rs45456595  | 0.107      | Acute lymphoblastic leukemia                                             |
| rs7865618   | 0.447      | Acute lymphoblastic leukemia                                             |
| rs1011970   | 0.0308     | Acute lymphoblastic leukemia                                             |
| rs1333040   | 0.782      | Acute lymphoblastic leukemia                                             |
| rs4977574   | 0.41       | Acute lymphoblastic leukemia                                             |
| rs10965235  | 0.551      | Acute lymphoblastic leukemia                                             |
| rs2383207   | 0.102      | Acute lymphoblastic leukemia                                             |
| rs3731217   | 2.00E-08   | Acute lymphoblastic leukemia                                             |
| rs17756311  | 1.40E-05   | Acute lymphoblastic leukemia                                             |
| rs7033598   | 8.00E-26   | Macular thickness                                                        |
| rs970987    | 3.00E-12   | Autoimmune traits                                                        |
| rs970987    | 6.00E-17   | Hypothyroidism                                                           |
| rs970987    | 2.00E-16   | Medication use (thyroid preparations)                                    |
| rs116945318 | 8.00E-06   | Refractive astigmatism                                                   |
| rs7868228   | 3.00E-06   | Gut microbiome composition (winter)                                      |
| rs12686364  | 6.00E-09   | Familial squamous cell lung carcinoma                                    |
| rs184042824 | 2.00E-06   | Time to smoke first cigarette in the morning                             |
| rs11999970  | 5.00E-07   | Pediatric bone mineral content (radius)                                  |
| rs7035284   | 1.00E-08   | Pediatric bone mineral content (radius)                                  |
| rs896655    | 2.00E-12   | Coronary artery disease                                                  |
| rs2004627   | 7.00E-06   | Interleukin-6 levels                                                     |
| rs12336169  | 2.00E-06   | Lung cancer in never smokers                                             |
| rs10811609  | 2.00E-06   | Lung cancer                                                              |
| rs4636294   | 3.00E-15   | Cutaneous nevi                                                           |
| rs11496368  | 4.00E-06   | Familial lung adenocarcinoma                                             |
| rs17755650  | 6.00E-06   | Diastolic blood pressure response to hydrochlorothiazide in hypertension |
| rs10429489  | 8.00E-06   | Non-small cell lung cancer                                               |
| rs10429489  | 5.00E-07   | Lung adenocarcinoma                                                      |
| rs10429489  | 7.00E-10   | Non-small cell lung cancer                                               |

|             |           |                                                                                        |
|-------------|-----------|----------------------------------------------------------------------------------------|
| rs4364717   | 1.00E-10  | Diastolic blood pressure                                                               |
| rs871024    | 3.00E-65  | Cutaneous malignant melanoma                                                           |
| rs869330    | 6.00E-113 | Nevus count or cutaneous melanoma                                                      |
| rs869329    | 7.00E-67  | Nevus count or cutaneous melanoma                                                      |
| rs869329    | 2.00E-37  | Nevus count                                                                            |
| rs201131773 | 3.00E-17  | Melanoma                                                                               |
| rs7023329   | 4.00E-07  | Melanoma                                                                               |
| rs7023329   | 7.00E-09  | Melanoma                                                                               |
| rs7023329   | 7.00E-09  | Melanoma                                                                               |
| rs885518    | 1.00E-09  | Lung adenocarcinoma                                                                    |
| rs11532907  | 2.00E-34  | Nevus count or cutaneous melanoma                                                      |
| rs67134687  | 7.00E-07  | Adverse response to drug                                                               |
| rs7026112   | 9.00E-06  | Lung cancer                                                                            |
| rs185224597 | 2.00E-07  | Lung function in heavy smokers (low FEV1 vs high FEV1)                                 |
| rs10811635  | 9.00E-06  | Depressive symptoms x dependent stressful life events interaction (2df test)           |
| rs142754775 | 4.00E-06  | Coronary artery calcified atherosclerotic plaque (130 HU threshold) in type 2 diabetes |
| rs12349081  | 6.00E-06  | Cancer                                                                                 |
| rs145542470 | 6.00E-10  | Coronary artery disease                                                                |
| rs2027939   | 3.00E-09  | Cutaneous malignant melanoma                                                           |
| rs3057314   | 7.00E-25  | Breast cancer                                                                          |
| rs3731257   | 5.00E-08  | Inflammatory bowel disease                                                             |
| rs3731249   | 1.00E-27  | Acute lymphoblastic leukemia in childhood (B cell precursor)                           |
| rs3731239   | 1.00E-06  | Nasopharyngeal carcinoma                                                               |
| rs113650570 | 8.00E-35  | B-cell acute lymphoblastic leukaemia                                                   |
| rs3731217   | 2.00E-08  | Acute lymphoblastic leukemia (B-cell precursor)                                        |
| rs3731217   | 7.00E-14  | Acute lymphoblastic leukemia in childhood (B cell precursor)                           |
| rs3731211   | 6.00E-14  | Platelet count                                                                         |
| rs3731211   | 5.00E-24  | Platelet count                                                                         |
| rs3731211   | 6.00E-29  | Plateletcrit                                                                           |
| rs3731211   | 6.00E-13  | Monocyte count                                                                         |
| rs3731211   | 4.00E-23  | Lymphocyte counts                                                                      |
| rs3731211   | 3.00E-13  | Red cell distribution width                                                            |

|            |          |                                                                                        |
|------------|----------|----------------------------------------------------------------------------------------|
| rs3731211  | 3.00E-15 | Eosinophil counts                                                                      |
| rs7036656  | 3.00E-12 | White blood cell count                                                                 |
| rs7036656  | 8.00E-37 | White blood cell count                                                                 |
| rs2811710  | 2.00E-13 | Multiple myeloma                                                                       |
| rs55797833 | 3.00E-19 | Cutaneous malignant melanoma                                                           |
| rs78545330 | 3.00E-06 | BRCA1/2-negative high-risk breast cancer                                               |
| rs61271866 | 7.00E-07 | Esophageal squamous cell carcinoma                                                     |
| rs35720900 | 4.00E-09 | White matter microstructure (radial diffusivities)                                     |
| rs3217992  | 4.00E-06 | Psychosis proneness (hypomanic personality scale and revised social anhedonia scale)   |
| rs3217992  | 7.00E-07 | Psychosis proneness (hypomanic personality scale)                                      |
| rs3217992  | 4.00E-06 | Psychosis proneness (hypomanic personality scale and perceptual aberration scale)      |
| rs3217992  | 4.00E-06 | Psychosis proneness (hypomanic personality scale and revised physical anhedonia scale) |
| rs1063192  | 5.00E-11 | Glaucoma (primary open-angle)                                                          |
| rs1063192  | 4.00E-15 | Vertical cup-disc ratio                                                                |
| rs1063192  | 8.00E-07 | Nasopharyngeal carcinoma                                                               |
| rs1063192  | 3.00E-18 | Type 2 diabetes                                                                        |
| rs3217986  | 4.00E-22 | Cutaneous malignant melanoma                                                           |
| rs2069426  | 4.00E-09 | Acute lymphoblastic leukemia (childhood)                                               |
| rs3217978  | 2.00E-10 | Coronary artery disease                                                                |
| rs2069418  | 5.00E-10 | White matter microstructure (fractional anisotropy)                                    |
| rs2069416  | 3.00E-08 | White matter microstructure (radial diffusivities)                                     |
| rs79356439 | 9.00E-13 | Cutaneous malignant melanoma                                                           |
| rs1101330  | 9.00E-09 | White matter microstructure (mean diffusivities)                                       |
| rs523096   | 5.00E-11 | Glaucoma                                                                               |
| rs518394   | 2.00E-10 | White matter microstructure (radial diffusivities)                                     |
| rs615552   | 4.00E-06 | Migraine without aura                                                                  |
| rs62560774 | 7.00E-09 | White matter microstructure (fractional anisotropy)                                    |
| rs564398   | 1.00E-06 | Type 2 diabetes                                                                        |
| rs564398   | 2.00E-07 | Coronary heart disease                                                                 |
| rs7865618  | 9.00E-11 | Glaucoma (primary open-angle)                                                          |
| rs7865618  | 1.00E-21 | Optic cup area                                                                         |
| rs7865618  | 9.00E-20 | Optic cup area                                                                         |

|            |          |                                     |
|------------|----------|-------------------------------------|
| rs7865618  | 2.00E-27 | Coronary heart disease              |
| rs7865618  | 5.00E-24 | Vertical cup-disc ratio             |
| rs634537   | 1.00E-15 | Non-glioblastoma glioma             |
| rs634537   | 1.00E-45 | Glioma                              |
| rs634537   | 7.00E-45 | Glioblastoma                        |
| rs634537   | 2.00E-21 | Glioma                              |
| rs634537   | 7.00E-14 | Glioma                              |
| rs634537   | 1.00E-20 | Glioblastoma                        |
| rs634537   | 2.00E-16 | Glioblastoma                        |
| rs634537   | 3.00E-08 | Non-glioblastoma glioma             |
| rs634537   | 4.00E-19 | Glioblastoma (age-stratified)       |
| rs634537   | 3.00E-15 | Glioblastoma (age-stratified)       |
| rs634537   | 1.00E-16 | Glioblastoma (age-stratified)       |
| rs2157719  | 1.00E-12 | Glaucoma (primary open-angle)       |
| rs2157719  | 2.00E-18 | Glaucoma (primary open-angle)       |
| rs2157719  | 5.00E-16 | Glioma                              |
| rs2157719  | 2.00E-11 | Non-glioblastoma glioma             |
| rs2157719  | 3.00E-17 | Glioma                              |
| rs2157719  | 6.00E-33 | Vertical cup-disc ratio             |
| rs2157719  | 4.00E-35 | Vertical cup-disc ratio             |
| rs2157719  | 3.00E-33 | Glaucoma (primary open-angle)       |
| rs2151280  | 3.00E-10 | Basal cell carcinoma                |
| rs2151280  | 9.00E-11 | Basal cell carcinoma                |
| rs1333037  | 1.00E-12 | Glaucoma (low intraocular pressure) |
| rs1333037  | 2.00E-23 | Glaucoma (primary open-angle)       |
| rs17694493 | 4.00E-08 | Prostate cancer                     |
| rs17694493 | 1.00E-06 | Prostate cancer                     |
| rs17694493 | 2.00E-10 | Prostate cancer                     |
| rs17694493 | 1.00E-06 | Adolescent idiopathic scoliosis     |
| rs1412830  | 9.00E-08 | Type 2 diabetes                     |
| rs1412829  | 2.00E-10 | Glioma (high-grade)                 |
| rs1412829  | 5.00E-07 | Nasopharyngeal carcinoma            |



|            |          |                                                               |
|------------|----------|---------------------------------------------------------------|
| rs1412829  | 3.00E-08 | Nasopharyngeal carcinoma                                      |
| rs1360589  | 3.00E-28 | Optic cup area                                                |
| rs1360589  | 3.00E-27 | Optic cup area                                                |
| rs1360589  | 5.00E-30 | Vertical cup-disc ratio                                       |
| rs1360589  | 1.00E-31 | Optic cup area                                                |
| rs1360589  | 2.00E-13 | Medication use (antiglaucoma preparations and miotics)        |
| rs10738605 | 6.00E-10 | Non-melanoma skin cancer                                      |
| rs10811645 | 1.00E-18 | Glaucoma (primary open-angle)                                 |
| rs944800   | 4.00E-14 | Glaucoma (primary open-angle)                                 |
| rs944800   | 3.00E-09 | White matter microstructure (radial diffusivities)            |
| rs944801   | 1.00E-11 | Type 2 diabetes                                               |
| rs944801   | 5.00E-91 | Vertical cup-disc ratio (multi-trait analysis)                |
| rs944801   | 2.00E-38 | Glaucoma (multi-trait analysis)                               |
| rs944801   | 3.00E-21 | Glaucoma                                                      |
| rs944801   | 2.00E-49 | Glaucoma (primary open-angle)                                 |
| rs944801   | 8.00E-36 | Glaucoma                                                      |
| rs62560775 | 2.00E-09 | Lung adenocarcinoma                                           |
| rs62560775 | 6.00E-07 | Lung cancer                                                   |
| rs6475604  | 3.00E-15 | Glaucoma                                                      |
| rs7874604  | 6.00E-27 | Keratinocyte cancer (MTAG)                                    |
| rs7874604  | 4.00E-36 | Basal cell carcinoma                                          |
| rs7874604  | 5.00E-13 | Basal cell carcinoma                                          |
| rs7039467  | 2.00E-07 | Longevity (age >99th survival percentile)                     |
| rs7039467  | 3.00E-54 | Vertical cup-disc ratio (multi-trait analysis)                |
| rs7039467  | 2.00E-37 | Vertical cup-disc ratio (adjusted for vertical disc diameter) |
| rs7866783  | 4.00E-08 | Glaucoma (primary open-angle)                                 |
| rs7866783  | 5.00E-64 | Vertical cup-disc ratio (adjusted for vertical disc diameter) |
| rs10120688 | 1.00E-08 | White matter microstructure (mean diffusivities)              |
| rs10120688 | 1.00E-08 | White matter microstructure (radial diffusivities)            |
| rs10120688 | 2.00E-12 | White matter microstructure (radial diffusivities)            |
| rs10120688 | 1.00E-08 | White matter microstructure (mean diffusivities)              |
| rs10120688 | 5.00E-12 | White matter microstructure (fractional anisotropy)           |

|             |          |                                                 |
|-------------|----------|-------------------------------------------------|
| rs1011970   | 3.00E-08 | Breast cancer                                   |
| rs1011970   | 6.00E-08 | Breast cancer                                   |
| rs1011970   | 2.00E-06 | Breast cancer (estrogen-receptor negative)      |
| rs1011970   | 5.00E-06 | Cancer (pleiotropy)                             |
| rs1011970   | 2.00E-07 | Cancer                                          |
| rs1011970   | 5.00E-07 | Breast cancer (estrogen-receptor negative)      |
| rs1011970   | 1.00E-15 | Breast cancer                                   |
| rs1011970   | 4.00E-09 | Breast cancer                                   |
| rs8181047   | 4.00E-09 | Oral cavity cancer                              |
| rs145929329 | 5.00E-12 | Glioblastoma                                    |
| rs10811650  | 2.00E-13 | Breast cancer                                   |
| rs10811650  | 2.00E-18 | Cutaneous melanoma or hair colour               |
| rs10811650  | 2.00E-15 | Hair color                                      |
| rs75883022  | 7.00E-13 | Cutaneous malignant melanoma                    |
| rs4977756   | 7.00E-15 | Glioma                                          |
| rs4977756   | 1.00E-08 | Glioma                                          |
| rs4977756   | 1.00E-14 | Glaucoma                                        |
| rs4977756   | 7.00E-30 | Glaucoma (primary open-angle)                   |
| rs4977756   | 7.00E-07 | Nasopharyngeal carcinoma                        |
| rs4645630   | 2.00E-08 | Macular thickness                               |
| rs10757269  | 9.00E-09 | Ankle-brachial index                            |
| rs9632884   | 5.00E-12 | Carotid plaque                                  |
| rs1831733   | 4.00E-18 | Medication use (antithrombotic agents)          |
| rs1831733   | 9.00E-09 | Medication use (salicylic acid and derivatives) |
| rs10811652  | 6.00E-11 | Coronary artery disease in diabetes             |
| rs6475606   | 4.00E-08 | Intracranial aneurysm                           |
| rs6475606   | 2.00E-22 | LDL cholesterol levels                          |
| rs6475606   | 6.00E-17 | Apolipoprotein B levels                         |
| rs1333040   | 2.00E-22 | Intracranial aneurysm                           |
| rs1333040   | 1.00E-10 | Intracranial aneurysm                           |
| rs1333040   | 7.00E-07 | Squamous cell lung carcinoma                    |
| rs1333040   | 3.00E-06 | Interleukin-6 levels                            |

|            |           |                                                                                                                                                                            |
|------------|-----------|----------------------------------------------------------------------------------------------------------------------------------------------------------------------------|
| rs1537370  | 2.00E-11  | Coronary artery calcification                                                                                                                                              |
| rs10738607 | 2.00E-13  | Coronary artery disease                                                                                                                                                    |
| rs10738607 | 7.00E-13  | Myocardial infarction                                                                                                                                                      |
| rs10738607 | 2.00E-09  | Total cholesterol levels                                                                                                                                                   |
| rs10757272 | 2.00E-07  | Intracranial aneurysm                                                                                                                                                      |
| rs10757272 | 3.00E-07  | Endometriosis                                                                                                                                                              |
| rs10757272 | 6.00E-06  | Endometriosis                                                                                                                                                              |
| rs9644861  | 5.00E-08  | Diastolic blood pressure                                                                                                                                                   |
| rs9644862  | 9.00E-12  | Carotid plaque burden                                                                                                                                                      |
| rs7866503  | 2.00E-13  | Intracranial, abdominal aortic or thoracic aortic aneurysm (pleiotropy)                                                                                                    |
| rs10757274 | 8.00E-45  | Coronary heart disease                                                                                                                                                     |
| rs10757274 | 2.00E-33  | Abdominal aortic aneurysm                                                                                                                                                  |
| rs4977574  | 5.00E-14  | Coronary artery disease                                                                                                                                                    |
| rs4977574  | 3.00E-44  | Myocardial infarction (early onset)                                                                                                                                        |
| rs4977574  | 1.00E-22  | Coronary heart disease                                                                                                                                                     |
| rs4977574  | 2.00E-25  | Coronary heart disease                                                                                                                                                     |
| rs4977574  | 8.00E-06  | Myocardial infarction                                                                                                                                                      |
| rs4977574  | 9.00E-223 | Coronary artery disease                                                                                                                                                    |
| rs4977574  | 1.00E-07  | Coronary artery disease                                                                                                                                                    |
| rs2891168  | 2.00E-98  | Coronary artery disease                                                                                                                                                    |
| rs2891168  | 5.00E-75  | Myocardial infarction                                                                                                                                                      |
| rs2891168  | 1.00E-101 | Coronary artery disease (myocardial infarction, percutaneous transluminal coronary angioplasty, coronary artery bypass grafting, angina or chronic ischemic heart disease) |
| rs2891168  | 5.00E-204 | Coronary artery disease                                                                                                                                                    |
| rs2891168  | 4.00E-18  | Medication use (beta blocking agents)                                                                                                                                      |
| rs1537371  | 3.00E-25  | Medication use (HMG CoA reductase inhibitors)                                                                                                                              |
| rs1556516  | 5.00E-16  | Parental longevity (combined parental attained age, Martingale residuals)                                                                                                  |
| rs1556516  | 7.00E-09  | Parental longevity (father's age at death)                                                                                                                                 |
| rs1556516  | 1.00E-20  | Parental longevity (father's attained age)                                                                                                                                 |
| rs1556516  | 2.00E-10  | Parental longevity (combined parental age at death)                                                                                                                        |
| rs1556516  | 2.00E-15  | Heart failure                                                                                                                                                              |
| rs1556516  | 7.00E-11  | Parental lifespan                                                                                                                                                          |

|            |          |                                                                     |
|------------|----------|---------------------------------------------------------------------|
| rs7859727  | 4.00E-10 | Stroke                                                              |
| rs7859727  | 2.00E-07 | Ischemic stroke                                                     |
| rs7859727  | 7.00E-08 | Stroke                                                              |
| rs7859727  | 1.00E-09 | Ischemic stroke                                                     |
| rs7859727  | 3.00E-10 | Healthspan                                                          |
| rs1537372  | 1.00E-08 | Colorectal cancer or advanced adenoma                               |
| rs1537372  | 4.00E-39 | Peripheral artery disease                                           |
| rs1537373  | 4.00E-11 | Coronary artery calcification                                       |
| rs1537373  | 7.00E-07 | Coronary artery calcification                                       |
| rs1333042  | 1.00E-09 | Coronary heart disease                                              |
| rs1333042  | 3.00E-07 | Parental longevity (mother's age at death or mother's attained age) |
| rs1333042  | 7.00E-15 | Parental longevity (father's age at death)                          |
| rs1333042  | 2.00E-08 | Parental longevity (both parents in top 10%)                        |
| rs1333042  | 2.00E-72 | Coronary artery disease                                             |
| rs1412834  | 4.00E-14 | Colorectal cancer                                                   |
| rs10733376 | 4.00E-12 | Intracranial aneurysm                                               |
| rs10965235 | 6.00E-12 | Endometriosis                                                       |
| rs944797   | 6.00E-16 | Coronary heart disease                                              |
| rs2383207  | 2.00E-08 | Abdominal aortic aneurysm                                           |
| rs1333045  | 6.00E-06 | Parental longevity (mother's age at death)                          |
| rs1333045  | 8.00E-09 | Minimum ankle-brachial index                                        |
| rs1333045  | 3.00E-12 | Pulse pressure                                                      |
| rs1333045  | 3.00E-07 | Serum total cholesterol levels                                      |
| rs1333045  | 1.00E-09 | Systolic blood pressure                                             |
| rs10217586 | 2.00E-06 | Colorectal or endometrial cancer                                    |
| rs10217586 | 1.00E-17 | Medication use (agents acting on the renin-angiotensin system)      |
| rs10757278 | 1.00E-20 | Myocardial infarction                                               |
| rs1333047  | 2.00E-07 | Large artery stroke                                                 |
| rs1333047  | 2.00E-10 | Pulse pressure                                                      |
| rs1333047  | 5.00E-08 | Hypertension                                                        |
| rs1333047  | 5.00E-18 | Medication use (vasodilators used in cardiac diseases)              |
| rs4977575  | 1.00E-07 | Pulse pressure                                                      |

|            |           |                                                               |
|------------|-----------|---------------------------------------------------------------|
| rs4977575  | 5.00E-23  | Coronary artery disease                                       |
| rs1333048  | 1.00E-06  | Age-related diseases and mortality                            |
| rs1333049  | 1.00E-13  | Coronary heart disease                                        |
| rs1333049  | 3.00E-19  | Coronary heart disease                                        |
| rs1333049  | 3.00E-24  | Coronary artery calcification                                 |
| rs1333049  | 1.00E-59  | Coronary artery disease or large artery stroke                |
| rs1333049  | 1.00E-56  | Coronary artery disease or ischemic stroke                    |
| rs1333049  | 3.00E-56  | Coronary artery disease                                       |
| rs1333049  | 7.00E-58  | Coronary heart disease                                        |
| rs1333049  | 9.00E-08  | Age-related diseases, mortality and associated endophenotypes |
| rs1333049  | 1.00E-25  | Coronary artery disease                                       |
| rs1333049  | 2.00E-192 | Coronary artery disease                                       |
| rs7020996  | 2.00E-07  | Type 2 diabetes                                               |
| rs7020996  | 6.00E-18  | Body mass index                                               |
| rs10965243 | 1.00E-15  | Hemoglobin A1c levels                                         |
| rs10965245 | 7.00E-07  | Hematological and biochemical traits                          |
| rs2383208  | 2.00E-29  | Type 2 diabetes                                               |
| rs2383208  | 3.00E-06  | Type 2 diabetes                                               |
| rs2383208  | 5.00E-33  | Type 2 diabetes                                               |
| rs2383208  | 3.00E-17  | Type 2 diabetes                                               |
| rs2383208  | 7.00E-12  | Glycated hemoglobin levels                                    |
| rs10965246 | 2.00E-16  | Blood sugar levels                                            |
| rs10965246 | 7.00E-21  | Medication use (drugs used in diabetes)                       |
| rs10965247 | 1.00E-87  | Type 2 diabetes                                               |
| rs10965248 | 4.00E-164 | Type 2 diabetes                                               |
| rs10965250 | 1.00E-10  | Type 2 diabetes                                               |
| rs10965250 | 6.00E-16  | Type 2 diabetes                                               |
| rs10965250 | 9.00E-15  | Type 2 diabetes                                               |
| rs10965250 | 4.00E-07  | Multiple sclerosis                                            |
| rs10965250 | 7.00E-07  | Type 2 diabetes                                               |
| rs76011118 | 1.00E-07  | Type 2 diabetes                                               |
| rs10811660 | 1.00E-115 | Type 2 diabetes                                               |

|            |          |                                               |
|------------|----------|-----------------------------------------------|
| rs10811660 | 3.00E-31 | Type 2 diabetes                               |
| rs10811661 | 5.00E-06 | Type 2 diabetes                               |
| rs10811661 | 8.00E-15 | Type 2 diabetes                               |
| rs10811661 | 8.00E-15 | Type 2 diabetes                               |
| rs10811661 | 7.00E-07 | Type 2 diabetes                               |
| rs10811661 | 1.00E-18 | Type 2 diabetes                               |
| rs10811661 | 9.00E-12 | Fasting plasma glucose                        |
| rs10811661 | 1.00E-06 | Fasting blood glucose                         |
| rs10811661 | 7.00E-06 | Fasting blood glucose (BMI interaction)       |
| rs10811661 | 1.00E-27 | Type 2 diabetes                               |
| rs10811661 | 4.00E-27 | Type 2 diabetes                               |
| rs10811661 | 5.00E-13 | Body mass index                               |
| rs10811661 | 1.00E-30 | Type 2 diabetes                               |
| rs10811661 | 2.00E-10 | Type 2 diabetes                               |
| rs10811661 | 2.00E-68 | Type 2 diabetes                               |
| rs10811661 | 9.00E-11 | Type 2 diabetes                               |
| rs10811661 | 1.00E-09 | Type 2 diabetes                               |
| rs10811661 | 4.00E-58 | Type 2 diabetes                               |
| rs10811661 | 2.00E-07 | Fasting blood glucose                         |
| rs10757283 | 2.00E-41 | Type 2 diabetes                               |
| rs10811662 | 1.00E-13 | Type 2 diabetes                               |
| rs10811662 | 6.00E-09 | Triglyceride levels                           |
| rs1333051  | 6.00E-10 | Type 2 diabetes                               |
| rs7018475  | 3.00E-08 | Type 2 diabetes                               |
| rs7018475  | 5.00E-06 | Glucose homeostasis traits                    |
| rs7018475  | 1.00E-08 | Hemoglobin A1c levels                         |
| rs7018475  | 5.00E-14 | Medication use (drugs used in diabetes)       |
| rs2065504  | 3.00E-09 | Monocyte percentage of white cells            |
| rs10811664 | 2.00E-31 | Platelet count                                |
| rs10757287 | 4.00E-10 | Granulocyte percentage of myeloid white cells |
| rs10757287 | 8.00E-19 | Platelet count                                |
| rs2065500  | 1.00E-10 | Neutrophil percentage of white cells          |

|             |          |                                                                                 |
|-------------|----------|---------------------------------------------------------------------------------|
| rs6475611   | 1.00E-36 | Plateletcrit                                                                    |
| rs6475611   | 3.00E-21 | Monocyte count                                                                  |
| rs6475611   | 3.00E-25 | Lymphocyte counts                                                               |
| rs6475611   | 9.00E-11 | Red cell distribution width                                                     |
| rs6475611   | 2.00E-27 | White blood cell count                                                          |
| rs944802    | 2.00E-11 | White blood cell count                                                          |
| rs137893140 | 8.00E-07 | Type 2 diabetes                                                                 |
| rs1333052   | 6.00E-07 | Type 2 diabetes                                                                 |
| rs12238587  | 9.00E-16 | Height                                                                          |
| rs72658409  | 1.00E-10 | Lung cancer                                                                     |
| rs72658409  | 2.00E-09 | Adenocarcinoma                                                                  |
| rs7864275   | 9.00E-06 | Trauma exposure in major depressive disorder-negative individuals               |
| rs7041895   | 1.00E-07 | Deep ovarian and/or rectovaginal disease with dense adhesions                   |
| rs7041895   | 4.00E-16 | Monocyte count                                                                  |
| rs17694933  | 2.00E-12 | White blood cell count                                                          |
| rs1333054   | 5.00E-17 | Lymphocyte counts                                                               |
| rs1537377   | 2.00E-09 | Endometriosis                                                                   |
| rs1537377   | 1.00E-10 | Endometriosis                                                                   |
| rs1537377   | 2.00E-08 | Endometriosis                                                                   |
| rs861189    | 8.00E-06 | Exploratory eye movement dysfunction in schizophrenia (responsive search score) |
| rs861189    | 3.00E-06 | Exploratory eye movement dysfunction in schizophrenia (number of eye fixations) |
| rs1679013   | 1.00E-08 | Chronic lymphocytic leukemia                                                    |
| rs1679013   | 2.00E-08 | Chronic lymphocytic leukemia                                                    |
| rs1679013   | 1.00E-14 | Cataracts (operation)                                                           |
| rs1679014   | 4.00E-06 | Endometrial cancer (endometrioid histology)                                     |
| rs1679014   | 6.00E-09 | Endometrial cancer                                                              |
| rs1575972   | 2.00E-09 | Type 2 diabetes                                                                 |
| rs1575972   | 6.00E-15 | Type 2 diabetes                                                                 |
| rs1575972   | 3.00E-07 | Type 2 diabetes                                                                 |
| rs1575972   | 5.00E-13 | Type 2 diabetes                                                                 |
| rs1359742   | 7.00E-09 | Chronic lymphocytic leukemia                                                    |
| rs961831    | 7.00E-06 | Personality dimensions                                                          |

|             |          |                                                                                                                                               |
|-------------|----------|-----------------------------------------------------------------------------------------------------------------------------------------------|
| rs10738626  | 1.00E-08 | Atopic dermatitis                                                                                                                             |
| rs34254072  | 3.00E-09 | Brain region volumes                                                                                                                          |
| rs1999124   | 3.00E-15 | Adolescent idiopathic scoliosis                                                                                                               |
| rs586716    | 8.00E-06 | Tuberculosis                                                                                                                                  |
| rs1032687   | 5.00E-08 | Educational attainment (years of education)                                                                                                   |
| rs62572328  | 8.00E-09 | Lung function (FVC)                                                                                                                           |
| rs10811723  | 3.00E-11 | Number of decayed, missing and filled tooth surfaces or use of dentures                                                                       |
| rs10811723  | 2.00E-11 | Dentures                                                                                                                                      |
| rs1499555   | 1.00E-06 | Crohn's disease (indolent vs progressive)                                                                                                     |
| rs34864022  | 1.00E-06 | Driving (hours per day)                                                                                                                       |
| rs34864022  | 1.00E-09 | Leisure sedentary behaviour (television watching)                                                                                             |
| rs1448792   | 2.00E-07 | Endometriosis                                                                                                                                 |
| rs1448792   | 1.00E-07 | Endometriosis                                                                                                                                 |
| rs1020463   | 3.00E-06 | Hip circumference                                                                                                                             |
| rs2210865   | 2.00E-06 | Post bronchodilator FEV1/FVC ratio in smoking                                                                                                 |
| rs613391    | 5.00E-06 | Quantitative traits                                                                                                                           |
| rs687184    | 2.00E-07 | Moderate-to-late spontaneous preterm birth                                                                                                    |
| rs9695226   | 4.00E-07 | Schizophrenia                                                                                                                                 |
| rs9695226   | 2.00E-07 | Schizophrenia                                                                                                                                 |
| rs9695226   | 7.00E-08 | Schizophrenia                                                                                                                                 |
| rs9695226   | 9.00E-08 | Schizophrenia                                                                                                                                 |
| rs10811771  | 8.00E-07 | Response to antipsychotic therapy (extrapyramidal side effects)                                                                               |
| rs10811772  | 2.00E-06 | Metabolite levels                                                                                                                             |
| rs7852363   | 2.00E-09 | Subclinical trait of interstitial lung disease (basilar peel-core ratio of high attenuation areas on CT scan)                                 |
| rs1823289   | 1.00E-09 | Refractive error                                                                                                                              |
| rs7031401   | 6.00E-06 | Periodontitis                                                                                                                                 |
| rs7849973   | 8.00E-06 | Autism spectrum disorder, attention deficit-hyperactivity disorder, bipolar disorder, major depressive disorder, and schizophrenia (combined) |
| rs12554707  | 2.00E-06 | Response to amphetamines                                                                                                                      |
| rs760063500 | 7.00E-06 | Trunk fat mass                                                                                                                                |
| rs13286845  | 4.00E-09 | Adventurousness                                                                                                                               |
| rs13286845  | 4.00E-08 | General risk tolerance (MTAG)                                                                                                                 |
| rs13286845  | 4.00E-08 | Systolic blood pressure                                                                                                                       |



|           |          |                         |
|-----------|----------|-------------------------|
| rs9886665 | 3.00E-09 | Systolic blood pressure |
|-----------|----------|-------------------------|

**Supplementary Table 2. CDKN2A coding mutations in GWCMC cohorts based on CCCG-ALL-2015 protocol**

|                                          | SNP ID       | Chr | Position* | Ref | Alt | Nucleotide alternation | Amino Acid Change | Variant type | # Patients | Allele frequency (%) |
|------------------------------------------|--------------|-----|-----------|-----|-----|------------------------|-------------------|--------------|------------|----------------------|
| CDKN2A:p16 <sup>INK4A</sup><br>NM_000077 | rs764362225  | 9   | 21974777  | C   | A   | c. 51C>A               | p. Ala17Ala       | silent       | 1          | 0.3                  |
|                                          | -            | 9   | 21974766  | C   | T   | c. 62C>T               | p. Ala21Val       | missense     | 1          | 0.3                  |
|                                          | rs1328708469 | 9   | 21974695  | G   | C   | c. 133G>C              | p. Gly45Arg       | missense     | 1          | 0.3                  |
|                                          | rs762397298  | 9   | 21971134  | C   | G   | c. 225C>G              | p. Pro75Pro       | silent       | 1          | 0.3                  |
|                                          | -            | 9   | 21971016  | G   | T   | c. 343G>T              | p. Val115Leu      | missense     | 1          | 0.3                  |
|                                          | -            | 9   | 21970972  | C   | A   | c. 387C>A              | p. Ser129X        | missense     | 1          | 0.3                  |
| CDKN2A:p14 <sup>ARF</sup><br>NM_058195   | -            | 9   | 21994240  | C   | G   | c. 92C>G               | p. Thr31Arg       | missense     | 2          | 0.6                  |
|                                          | -            | 9   | 21994164  | G   | A   | c. 168G>A              | p. Gly56Gly       | silent       | 1          | 0.3                  |
|                                          | rs762397298  | 9   | 21971134  | C   | G   | c. 268C>G              | p. Arg90Gly       | missense     | 1          | 0.3                  |
|                                          | -            | 9   | 21971016  | G   | T   | c. 386G>T              | p. Arg129Leu      | missense     | 1          | 0.3                  |
| CDKN2A:smARF<br>NM_058195                | -            | 9   | 21971016  | G   | T   | c. 245G>T              | p. Arg82Leu       | missense     | 1          | 0.3                  |

**Supplementary Table 3. Summary of current clinical trials of CDK4/6 inhibitors for R/R-ALL treatment**

| Study Identifier | Study Name                                                                                                                                        | Interventions                                          | Age Population | Outcome Measures | Phases      | Enrollment | Locations | Study Start | Estimated Completion | Status     |
|------------------|---------------------------------------------------------------------------------------------------------------------------------------------------|--------------------------------------------------------|----------------|------------------|-------------|------------|-----------|-------------|----------------------|------------|
| NCT03472573      | Palbociclib and Dexamethasone in Treating Participants With Relapsed or Refractory B-Cell Acute Lymphoblastic Leukemia                            | <b>Palbociclib</b> , Dexamethasone                     | >=18 years old | Safety, DLT      | Phase I     | 24         | USA       | 2018        | 2022                 | Recruiting |
| NCT03515200      | Treatment With Combination Chemotherapy for Relapsed or Refractory Acute Lymphoblastic Leukemia                                                   | <b>Palbociclib</b> , Bortezomib, <i>et al</i>          | <=21 years old | Safety, efficacy | Phase I     | 12         | USA       | 2018        | 2020                 | Terminated |
| NCT02310243      | Study of Palbociclib in MLL-rearranged Acute Leukemias                                                                                            | <b>Palbociclib</b>                                     | >=18 years old | Safety, DLT      | Phase I, II | 50         | Germany   | 2015        | 2019                 | Recruiting |
| NCT03792256      | Palbociclib in Combination With Chemotherapy in Treating Children With Relapsed Acute Lymphoblastic Leukemia (ALL) or Lymphoblastic Lymphoma (LL) | <b>Palbociclib</b> , Cytarabine, <i>et al</i>          | 1-31 years old | Safety, DLT      | Phase I     | 15         | USA       | 2019        | 2021                 | Recruiting |
| NCT03132454      | Palbociclib and Sorafenib, Decitabine, or Dexamethasone in Treating Patients With Recurrent or Refractory Leukemia                                | <b>Palbociclib</b> , Decitabine, <i>et al</i>          | >=15 years old | Safety, DLT      | Phase I     | 54         | USA       | 2017        | 2021                 | Recruiting |
| NCT03878524      | Serial Measurements of Molecular and Architectural Responses to Therapy (SMMART) PRIME Trial                                                      | <b>Palbociclib</b> , <b>Abemaciclib</b> , <i>et al</i> | >=21 years old | Safety, efficacy | Phase I     | 40         | USA       | 2020        | 2025                 | Recruiting |
| NCT03740334      | Ribociclib in Combination With Everolimus and Dexamethasone in Relapsed ALL                                                                       | <b>Ribociclib</b> , Dexamethasone, <i>et al</i>        | 1-30 years old | Safety, DLT      | Phase I     | 45         | USA       | 2019        | 2023                 | Recruiting |



**Supplementary Table 4. List of primers used in the study**

| <b>Primer Name</b>                                        | <b>Primer sequence 5'–3'</b>       |
|-----------------------------------------------------------|------------------------------------|
| <b>CDKN2A PCR primers</b>                                 |                                    |
| CDKN2A Exon1 forward                                      | GCTGCCTGGAGTTGCGTTC                |
| CDKN2A Exon1 reverse                                      | TGTAACCCGAATGGGAAGC                |
| CDKN2A Exon2 forward                                      | AACGCACTCAAACACGCCT                |
| CDKN2A Exon2 reverse                                      | GAGAATCGAAGCGCTACCTGA              |
| CDKN2A Exon3 forward                                      | GACGACAGCTCCGCAGAAGTT              |
| CDKN2A Exon3 reverse                                      | GGCTGAACTTCTGTGCTGGAA              |
| CDKN2A Exon4 forward                                      | GTGAAGCCATTGCGAGAACTT              |
| CDKN2A Exon4 reverse                                      | TCGATCTTGAGACACGGCTTTT             |
| <b>Sanger Sequencing primers</b>                          |                                    |
| CDKN2A Exon1                                              | GCTGCCTGGAGTTGCGTTC                |
| CDKN2A Exon2                                              | AACGCACTCAAACACGCCT                |
| CDKN2A Exon3                                              | GACGACAGCTCCGCAGAAGTT              |
| CDKN2A Exon4                                              | GTGAAGCCATTGCGAGAACTT              |
| <b>Primers for Site-Directed Mutagenesis Substitution</b> |                                    |
| c120c-p16INK4A-A21V-IRES-GFP-F                            | ACGGCCGCGGtCCGGGGTCGG              |
| c120c-p16INK4A-A21V-IRES-GFP-R                            | GGCCAGCCAGTCAGCCGAAGGCTCC          |
| c120c-p16INK4A-A36V-IRES-GFP-F                            | GAGGCGGGGGtGCTGCCCAAC              |
| c120c-p16INK4A-A36V-IRES-GFP-R                            | CAGCAGCGCCCGCACCTC                 |
| c120c-p16INK4A-G45A-IRES-GFP-F                            | GAATAGTTACcGTCGGAGGCCGATCCAGGTCATG |
| c120c-p16INK4A-G45A-IRES-GFP-R                            | GGTGCCTTGGCAGCGCC                  |
| c120c-p16INK4A-A57V-IRES-GFP-F                            | ATGGGCAGCGtCCGAGTGGCG              |
| c120c-p16INK4A-A57V-IRES-GFP-R                            | CATCATGACCTGGATCGGCCTCCG           |
| c120c-p16INK4A-R99Q-IRES-GFP-F                            | GTGCTGCACCgGGCCGGGGCG              |
| c120c-p16INK4A-R99Q-IRES-GFP-R                            | CACCAGCGTGTCCAGGAAGCC              |
| c120c-p16INK4A-V115L-IRES-GFP-F                           | CCGTCTGCCCtTGGACCTGGC              |
| c120c-p16INK4A-V115L-IRES-GFP-R                           | CCCCAGGCATCGCGCACG                 |
| c120c-p16INK4A-D125H-IRES-GFP-F                           | GGGCCATCGCtATGTCGCACG              |
| c120c-p16INK4A-D125H-IRES-GFP-R                           | AGTCTCTCAGCCAGGTCC                 |

|                                 |                             |
|---------------------------------|-----------------------------|
| c120c-p16INK4A-A127S-IRES-GFP-F | TCGCGATGTCtCACGGTACCTGC     |
| c120c-p16INK4A-A127S-IRES-GFP-R | TGGCCCAGCTCCTCAGCC          |
| c120c-p16INK4A-S129X-IRES-GFP-F | TCGCACGGTAaCTGCGCGCGG       |
| c120c-p16INK4A-S129X-IRES-GFP-R | CATCGCGATGGCCCAGCTCC        |
| c120c-p16INK4A-R138G-IRES-GFP-F | GGGGGGCACCgGAGGCAGTAAC      |
| c120c-p16INK4A-R138G-IRES-GFP-R | GCAGCCGCGCGCAGGTAC          |
| c120c-p16INK4A-H142R-IRES-GFP-F | GGCAGTAACCgTGCCCGCATAGATGC  |
| c120c-p16INK4A-H142R-IRES-GFP-R | TCTGGTGCCCCCGCAGC           |
| c120c-p16INK4A-A143T-IRES-GFP-F | CAGTAACCATaCCCGCATAGATGCCGC |
| c120c-p16INK4A-A143T-IRES-GFP-R | CCTCTGGTGCCCCCGCA           |
| c120c-p16INK4A-A148T-IRES-GFP-F | CATAGATGCCaCGGAAGGTCCC      |
| c120c-p16INK4A-A148T-IRES-GFP-R | CGGGCATGGTTACTGCCT          |

**Supplementary Table 5. Reagents used in this study**

| Product Name                              | Supplier     | LOT number |
|-------------------------------------------|--------------|------------|
| Propidium Iodide Flow Cytometry Kit       | Abcam        | ab139418   |
| CloneAmp HiFi PCR Premix                  | Clontech     | 639298     |
| CCK8 kit                                  | DOJINDO      | CK04       |
| Q5 Site-Directed Mutagenesis Kit          | NEB          | E0552S     |
| Recombinant Murine IL-3                   | PeproTech    | 213-13     |
| Lipofectamine™ 3000 Transfection Reagent  | Thermofisher | L3000015   |
| Palbociclib                               | Selleck      | S1116      |
| Ribociclib                                | TargetMol    | T6199      |
| Abemaciclib                               | TargetMol    | T2381      |
| alpha Tubulin Mouse Monoclonal Antibody   | Proteintech  | 66031-1    |
| CDKN2A/p16INK4a antibody [EPR1473]        | Abcam        | ab108349   |
| p16 INK4A (D3W8G) Rabbit mAb              | CST          | 92803S     |
| GFP (D5.1) XP® Rabbit mAb                 | CST          | 2956S      |
| Bcr Antibody                              | CST          | 3902S      |
| CDK6 (DCS83) Mouse mAb                    | CST          | 3136S      |
| Phospho-CDK4 (Thr172) Polyclonal Antibody | Thermofisher | PA564482   |
| Anti-Cdk4 antibody                        | Abcam        | ab137675   |
| Recombinant Anti-Rb antibody [EPR17512]   | Abcam        | ab181616   |
| Phospho Rb (S811) antibody [EPR224]       | Abcam        | ab109399   |
| Recombinant Anti-E2F2 antibody [EPR8622]  | Abcam        | ab138515   |
