# Supplementary figures and images for: The functional role of inherited CDKN2A variants in childhood acute lymphoblastic leukemia
Source: PubMed Central journal article supplement — Pharmacogenet Genomics. 2021 Aug 6;32(2):43–50. doi: 10.1097/FPC.0000000000000451 (PMC8694244; doi:10.1097/fpc.0000000000000451), 2021-08-06

# Supplementary Figure 1

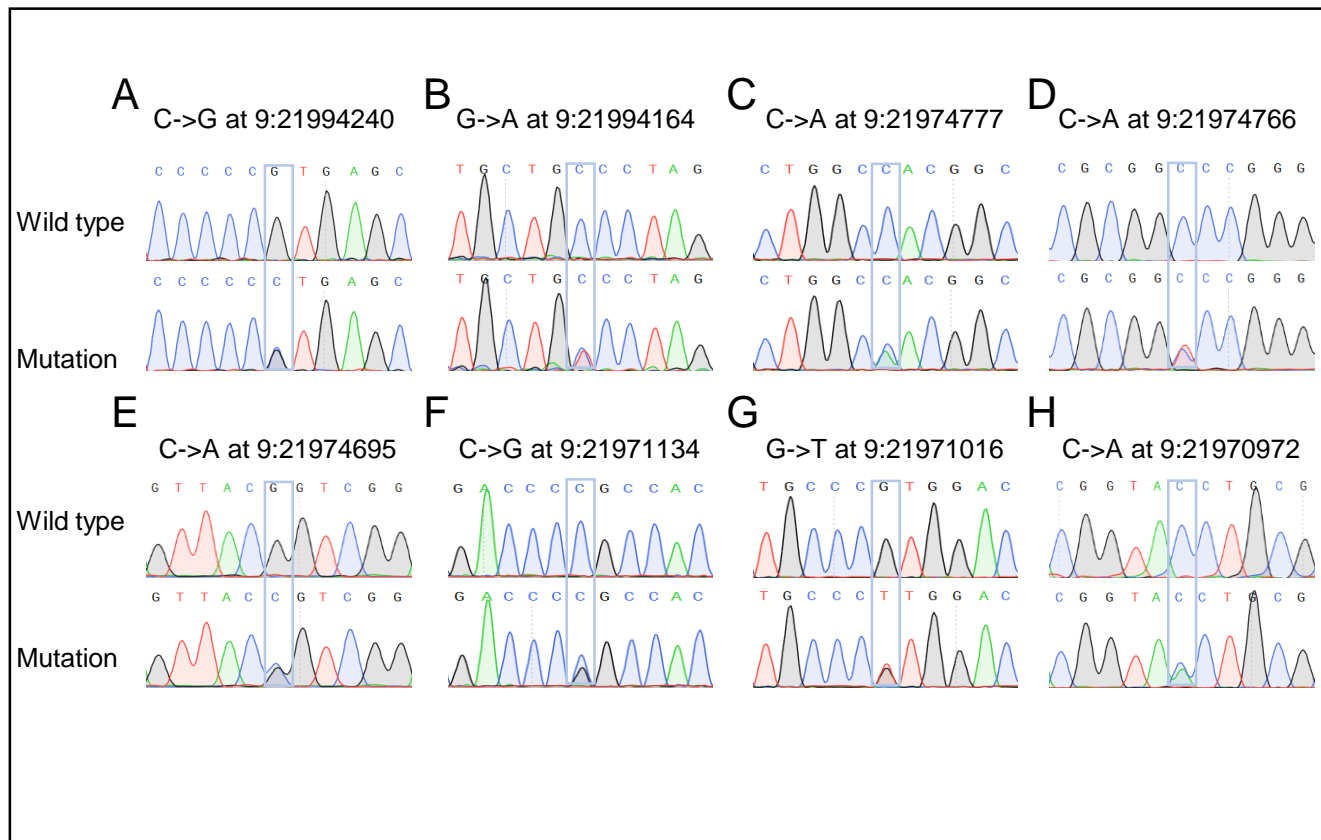

## Supplementary Figure 2

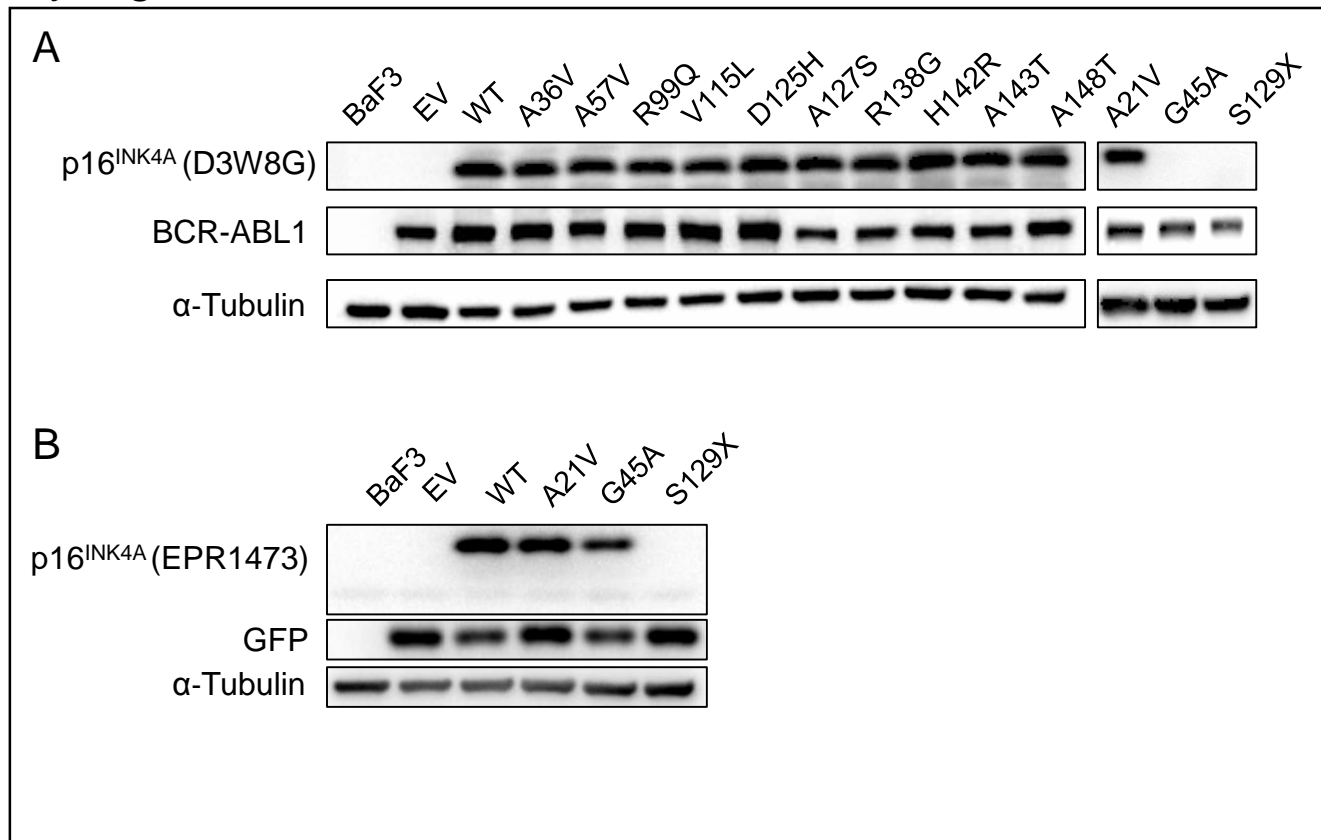

# Supplementary Figure 3

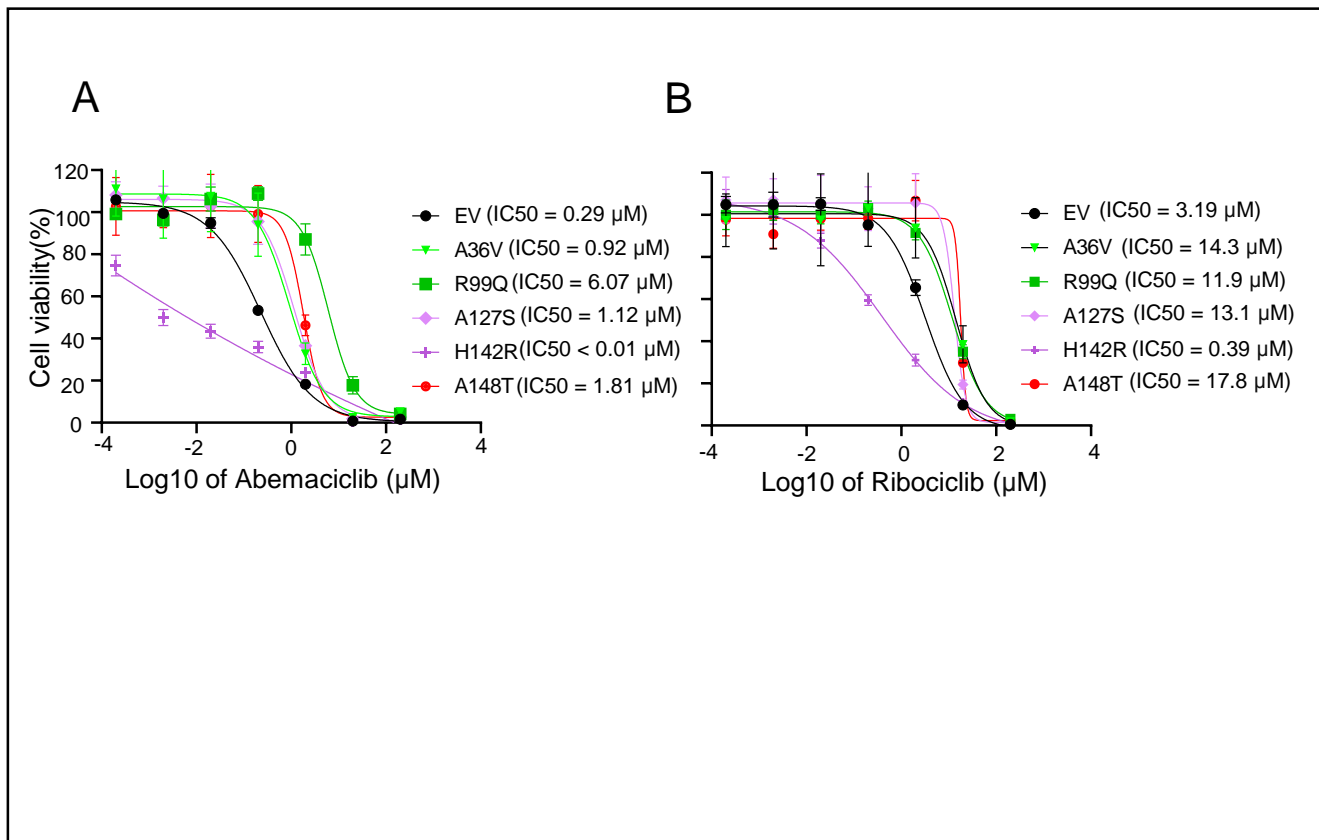

# Supplementary Figure 4

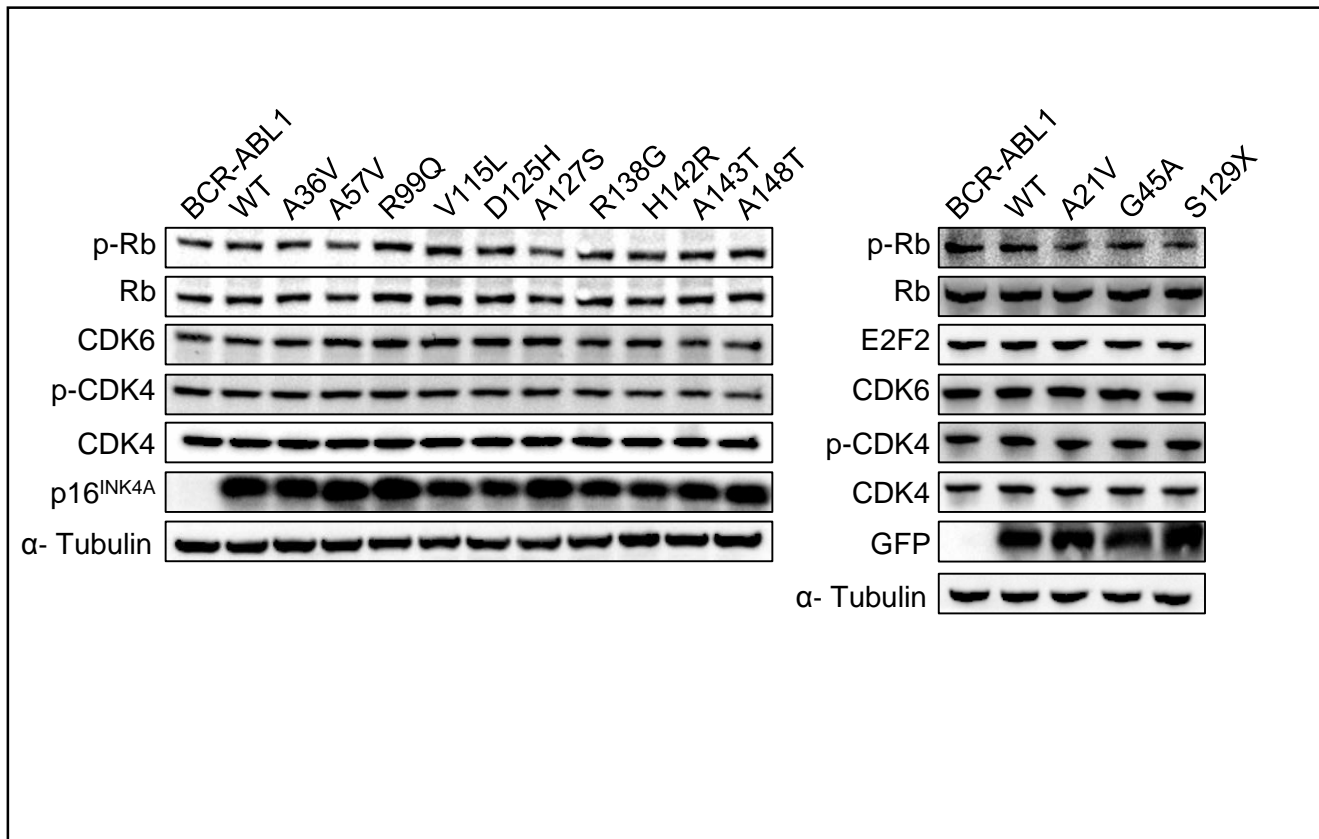

Supplement: pgen-32-43-s002.pdf [file pgen-32-43-s002.pdf]
